# Supplementary material for: Evaluation of MTBDRplusand MTBDRslin Detecting Drug-Resistant Tuberculosis in a Chinese Population
Source: Hindawi journal article supplement (doi:10.1155/2016/2064765), 2016-01-01
Supplement: f1 [file 2064765.f1.pdf]

550 **Supplemental Table 1. Patterns of drug resistance by GenoType MTBDR<sub>plus</sub> and MTBDR<sub>sl</sub> and sequencing analysis**

| Drug                   | Band on the strip | Target mutation | Strain No. | Conventional DST (Strain No.) | Sequencing (Strain No.) | Mutation by sequencing (amino acid) (Strain No.)                                                                                                                                                                                                                                                                           |
|------------------------|-------------------|-----------------|------------|-------------------------------|-------------------------|----------------------------------------------------------------------------------------------------------------------------------------------------------------------------------------------------------------------------------------------------------------------------------------------------------------------------|
| <b>RFP</b>             |                   |                 |            |                               |                         |                                                                                                                                                                                                                                                                                                                            |
| <i>rpoB</i> ΔWT8, MUT3 |                   | S531L           | 40         | R (40)                        |                         |                                                                                                                                                                                                                                                                                                                            |
| <i>rpoB</i> ΔWT8       |                   | 530-533         | 8          | R (7)                         | √ (7)                   | <i>rpoB</i> TCG(S) 531 ATG(M) (1)<br><i>rpoB</i> TCG(S) 531 TGG(W) + <i>rpoB</i> GAG(E) 504 GCG(A) (1)<br><i>rpoB</i> TCG(S) 531 TGG(W) (2)<br><i>rpoB</i> TCG(S) 531 CAG(Q) (1)<br><i>rpoB</i> CTG(L) 533 CCG(P) + <i>rpoB</i> GAC(D) 516 GCC(A) (1)<br><i>rpoB</i> CTG(L) 533 CCC(P) + <i>rpoB</i> AAC(N) 518 AGC(S) (1) |
| <i>rpoB</i> ΔWT7,ΔWT8  |                   | 526-533         | 2          | S (1)<br>R (2)                | √ (1)<br>√ (2)          | <i>rpoB</i> CTG(L) 533 CCG(P) (1)<br><i>rpoB</i> TCG(S) 531 GCG(A) + <i>rpoB</i> CAC(H) 526 CTC(L) (1)<br><i>rpoB</i> CAC(H) 526 AAC(N) (1)                                                                                                                                                                                |
| <i>rpoB</i> ΔWT7,MUT2B |                   | H526D           | 6          | R (6)                         |                         |                                                                                                                                                                                                                                                                                                                            |
| <i>rpoB</i> ΔWT7,MUT2A |                   | H526Y           | 8          | R (8)                         |                         |                                                                                                                                                                                                                                                                                                                            |
| <i>rpoB</i> ΔWT7,MUT1  |                   | D516V           | 1          | R (1)                         |                         |                                                                                                                                                                                                                                                                                                                            |
| <i>rpoB</i> ΔWT8,MUT3  |                   | S531L           | 40         | R (40)                        |                         |                                                                                                                                                                                                                                                                                                                            |
| <i>rpoB</i> ΔWT8       |                   | 530-533         | 8          | R (7)                         | √ (7)                   | <i>rpoB</i> TCG(S) 531 ATG(M) (1)<br><i>rpoB</i> TCG(S) 531 TGG(W) + <i>rpoB</i> GAG(E)                                                                                                                                                                                                                                    |

|                            |          |   |       |       |                                                                               |
|----------------------------|----------|---|-------|-------|-------------------------------------------------------------------------------|
|                            |          |   |       |       | <i>rpoB</i> T <u>C</u> G(S) 531 T <u>G</u> G(W) (2)                           |
|                            |          |   |       |       | <i>rpoB</i> T <u>C</u> G(S) 531 <u>C</u> AG(Q) (1)                            |
|                            |          |   |       |       | <i>rpoB</i> C <u>T</u> G(L) 533 C <u>C</u> G(P) + <i>rpoB</i> G <u>A</u> C(D) |
|                            |          |   |       |       | <i>rpoB</i> C <u>T</u> G(L) 533 C <u>C</u> C(P) + <i>rpoB</i> A <u>A</u> C(N) |
|                            |          |   | S (1) | √ (1) | <i>rpoB</i> C <u>T</u> G(L) 533 C <u>C</u> G(P) (1)                           |
| <i>rpoB</i> ΔWT7,ΔWT8      | 526-533  | 2 | R (2) | √ (2) | <i>rpoB</i> T <u>C</u> G(S) 531 <u>G</u> CG(A) + <i>rpoB</i> C <u>A</u> C(H)  |
|                            |          |   |       |       | <i>rpoB</i> <u>C</u> AC(H) 526 <u>A</u> AC(N) (1)                             |
| <i>rpoB</i> ΔWT7,MUT2B     | H526D    | 6 | R (6) |       |                                                                               |
| <i>rpoB</i> ΔWT7,MUT2A     | H526Y    | 8 | R (8) |       |                                                                               |
| <i>rpoB</i> ΔWT7,MUT1      | D516V    | 1 | R (1) |       |                                                                               |
| <i>rpoB</i> ΔWT7,(MUT2B)   | 526-529  | 3 | R (3) | √ (3) | <i>rpoB</i> <u>C</u> AC(H) 526 <u>G</u> AC(D) + <i>rpoB</i> G <u>A</u> A(E)   |
|                            |          |   |       |       | <i>rpoB</i> <u>C</u> AC(H) 526 <u>G</u> AC(D) (2)                             |
| <i>rpoB</i> ΔWT7,(MUT2A)   | 526-529  | 2 | R (2) | √ (2) | <i>rpoB</i> <u>C</u> AC(H) 526 T <u>A</u> C(Y) (2)                            |
| <i>rpoB</i> ΔWT7           | 526-529  | 6 | R (5) | √ (5) | <i>rpoB</i> C <u>A</u> C(H) 526 C <u>G</u> C(R) (2)                           |
|                            |          |   |       |       | <i>rpoB</i> <u>C</u> AC(H) 526 <u>G</u> AC(D) (2)                             |
|                            |          |   |       |       | <i>rpoB</i> C <u>A</u> C(H) 526 C <u>T</u> C(L) (1)                           |
|                            |          |   | S (1) | √ (1) | <i>rpoB</i> C <u>A</u> C(H) 526 C <u>T</u> C(L) (1)                           |
| <i>rpoB</i> ΔWT6           | 518-525  | 3 | R (2) | √ (2) | <i>rpoB</i> T <u>C</u> G(S) 522 T <u>T</u> G(L) (2)                           |
|                            |          |   | S (1) | √ (1) | <i>rpoB</i> T <u>C</u> G(S) 522 T <u>T</u> G(L) (1)                           |
| <i>rpoB</i> ΔWT3,ΔWT8      | 513-517, | 1 | R (1) | √ (1) | <i>rpoB</i> <u>A</u> TG(M) 515 <u>C</u> TG(L) + <i>rpoB</i> C <u>T</u> G(L)   |
| <i>rpoB</i> ΔWT3,ΔWT4,ΔWT8 | 513-519, | 3 | R (3) | √ (3) | <i>rpoB</i> G <u>A</u> C(D) 516 G <u>G</u> C(G) + <i>rpoB</i> C <u>T</u> G(L) |
|                            |          |   |       |       | <i>rpoB</i> G <u>A</u> C(D) 516 G <u>C</u> C(A) + <i>rpoB</i> C <u>T</u> G(L) |
| <i>rpoB</i> ΔWT3,ΔWT4,MUT1 | D516V    | 2 | R (2) |       |                                                                               |
| <i>rpoB</i> ΔWT3,ΔWT4      | 513-519  | 2 | R (1) | √ (1) | <i>rpoB</i> <u>G</u> AC(D) 516 T <u>A</u> C(Y) + <i>rpoB</i> C <u>C</u> C(P)  |
|                            |          |   | S (1) | √ (1) | <i>rpoB</i> G <u>A</u> C(D) 516 G <u>G</u> C(G) (1)                           |

|     |                             |          |    |        |       |                                                                              |
|-----|-----------------------------|----------|----|--------|-------|------------------------------------------------------------------------------|
| INH | <i>rpoB</i> ΔWT2,ΔWT7       | 510-513, | 1  | R (1)  | √ (1) | <i>rpoB</i> C <u>A</u> C(H) 526 C <u>G</u> C(R) + <i>rpoB</i> <u>A</u> GC(S) |
|     | <i>rpoB</i> ΔWT2,ΔWT3       | 510-517  | 1  | R (1)  | √ (1) | <i>rpoB</i> C <u>A</u> A(Q) 513 C <u>T</u> A(L) (1)                          |
|     | <i>rpoB</i> ΔWT1            | 505-509  | 2  | R (2)  | √ (2) | <i>rpoB</i> A <u>T</u> C(I) 572 A <u>C</u> C(T) (2)                          |
|     | <i>rpoB</i> ΔWT,MUT2B       | H526D    | 1  | R (1)  |       |                                                                              |
|     | <i>rpoB</i> MUT2A,MUT3      | H526Y,   | 1  | R (1)  |       |                                                                              |
|     | <i>rpoB</i> MUT1            | D516V    | 2  | R (2)  |       |                                                                              |
|     | <i>rpoB</i> WT              |          | 4  | S (4)  |       |                                                                              |
|     | <i>katG</i> ΔWT,MUT2,(MUT1) | S315T    | 1  | R (1)  | √ (1) | <i>katG</i> A <u>G</u> C(S) 315 A <u>C</u> A(T)(1)                           |
|     | <i>katG</i> ΔWT,MUT1        | S315T    | 54 | R (53) |       |                                                                              |
|     |                             |          |    | S (1)  | √ (1) | <i>inhA</i> C -15 T (1)                                                      |
|     | <i>katG</i> ΔWT,MUT2        | S315T    | 1  | R (1)  |       |                                                                              |
|     | <i>katG</i> ΔWT             | 315      | 3  | R (3)  | √ (3) | <i>katG</i> A <u>G</u> C(S) 315 A <u>A</u> C(N) (1)                          |
|     |                             |          |    |        |       | <i>katG</i> A <u>G</u> C(S) 315 A <u>A</u> C(N) + <i>katG</i> <u>A</u> TC(I) |
|     |                             |          |    |        |       | <i>katG</i> A <u>G</u> C(S) 315 A <u>A</u> C(N) + <i>inhA</i> C -15 T (1)    |
|     | Δ <i>katG</i> ΔWT           | 315      | 3  | R (3)  | √ (3) | <i>katG</i> , <i>inhA</i> NM (1)                                             |
|     |                             |          |    |        |       | NA (2)                                                                       |
|     | <i>katG</i> WT              |          | 37 | R (21) |       |                                                                              |
|     |                             |          |    | S (16) |       |                                                                              |
|     | <i>inhA</i> ΔWT1,(MUT1)     | -15      | 1  | R (1)  | √ (1) | <i>inhA</i> C -15 T (1)                                                      |
|     | <i>inhA</i> ΔWT2            | -8       | 4  | R (4)  | √ (4) | <i>katG</i> A <u>G</u> C(S) 315 A <u>A</u> C(N) (1)                          |
|     |                             |          |    |        |       | <i>katG</i> A <u>G</u> C(S) 315 A <u>C</u> C(T) (2)                          |
|     |                             |          |    |        |       | <i>inhA</i> C-34 T (1)                                                       |
|     | <i>inhA</i> MUT1            | C-15T    | 1  | R (1)  |       |                                                                              |
|     | <i>inhA</i> WT              |          | 74 | R (66) |       |                                                                              |

|     |                                                   |         |       |          |                                                            |
|-----|---------------------------------------------------|---------|-------|----------|------------------------------------------------------------|
|     |                                                   |         | S (8) |          |                                                            |
|     | <i>inhA</i> ΔWT1,MUT1                             | C-15T   | 12    | R (3)    |                                                            |
|     |                                                   |         | S (9) | √ (9)    | <i>inhA</i> C -15 T (9)                                    |
|     | ( <i>inhA</i> ) <i>inhA</i> WT                    |         | 4     | R (4)    | √ (4) <i>katG</i> , <i>inhA</i> NM (4)                     |
|     | ( <i>inhA</i> )( <i>inhA</i> WT2) <i>inhA</i> WT1 | -16     | 3     | R (3)    | √ (3) <i>inhA</i> C -26 T (2)                              |
|     |                                                   |         |       |          | <i>katG</i> , <i>inhA</i> NM (1)                           |
|     | <i>katG</i> WT+ <i>inhA</i> WT*                   |         | 18    | R (10)   | √ (10) <i>katG</i> GGC(G) 299 GTC(V) (1)                   |
|     |                                                   |         |       |          | <i>katG</i> , <i>inhA</i> NM (9)                           |
| OFX | <i>gyrA</i> ΔWT3,MUT1,MUT3B                       | A90V,   | 3     | R (3)    |                                                            |
|     | <i>gyrA</i> ΔWT3,MUT3D,(MUT1)                     | A90V,   | 1     | R (1)    | √ (1) <i>gyrA</i> GAC(D) 94 CAC(H) (1)                     |
|     | <i>gyrA</i> ΔWT3,MUT3A                            | D94A    | 2     | R (1)    | √ (1)                                                      |
|     |                                                   |         |       | S (1)    | <i>gyrA</i> GAC(D) 94 GCC(A) (1)                           |
|     | <i>gyrA</i> ΔWT3,MUT3B                            | D94N    | 2     | R (2)    |                                                            |
|     | <i>gyrA</i> ΔWT3,MUT3C                            | D94G    | 7     | R (5)    |                                                            |
|     | <i>gyrA</i> ΔWT3,MUT1                             | A90V    | 2     | R (2)    |                                                            |
|     | <i>gyrA</i> ΔWT2,MUT1                             | A90V    | 3     | R (2)    |                                                            |
|     |                                                   |         |       | S (1)    | √ (1) <i>gyrA</i> GCG(A) 90 GTG(V) (1)                     |
|     |                                                   |         |       |          |                                                            |
| OFX | <i>gyrA</i> ΔWT2,MUT2                             | S91P    | 1     | R (1)    |                                                            |
|     | <i>gyrA</i> ΔWT2                                  | 89-93   | 1     | R (1)    | √ (1) <i>gyrA</i> GCG(A) 90 GTG(V) + <i>gyrA</i> TCG(S) 91 |
|     | <i>gyrA</i> MUT3A,(MUT1,WT3)                      | (A90V), | 1     | R (1)    | √ (1) <i>gyrA</i> GAC(D) 94 GCC(A) (1)                     |
|     | <i>gyrA</i> MUT3A                                 | D94A    | 3     | R (3)    |                                                            |
|     | <i>gyrA</i> MUT3C,(MUT1,WT3)                      | (A90V), | 3     | R (2)    | √ (2) <i>gyrA</i> GAC(D) 94 GGC(G) (2)                     |
|     |                                                   | D94G    |       | ---† (1) | √ (1) <i>gyrA</i> GAC(D) 94 GGC(G) (1)                     |
|     | <i>gyrA</i> MUT3C                                 | D94G    | 2     | R (2)    |                                                            |

|            |                              |        |    |          |       |                                                                                |
|------------|------------------------------|--------|----|----------|-------|--------------------------------------------------------------------------------|
|            | <i>gyrA</i> MUT1,MUT3C,(WT3) | A90V,  | 2  | R (2)    | √ (2) | <i>gyrA</i> G <u>A</u> C(D) 94 G <u>G</u> C(G) (2)                             |
|            | <i>gyrA</i> MUT1,MUT3C       | A90V,  | 2  | R (2)    |       |                                                                                |
|            | <i>gyrA</i> MUT1,(MUT3C)     | A90V,  | 1  | S (1)    | √ (1) | <i>gyrA</i> , <i>gyrB</i> NM (1)                                               |
|            | <i>gyrA</i> MUT1,(WT2)       | A90V   | 1  | R (1)    | √ (1) | <i>gyrA</i> G <u>C</u> G(A) 90 G <u>T</u> G(V) (1)                             |
|            | <i>gyrA</i> MUT1             | A90V   | 6  | R (5)    |       |                                                                                |
|            |                              |        |    | S (1)    | √ (1) | <i>gyrA</i> G <u>C</u> G(A) 90 G <u>T</u> G(V) (1)                             |
|            | <i>gyrA</i> WT               |        | 56 | R (2)    | √ (2) | <i>gyrB</i> A <u>C</u> C(T) 511 A <u>A</u> C(N) (1)                            |
|            |                              |        |    | S (50)   |       | <i>gyrB</i> G <u>T</u> G(V) 422 G <u>G</u> G(G) + <i>gyrB</i> C G <u>A</u> (R) |
|            |                              |        |    | ---† (4) | √ (4) | <i>gyrA</i> , <i>gyrB</i> NM (4)                                               |
| <b>Km</b>  | <i>rrs</i> ΔWT1,MUT1         | A1401G | 4  | R (3)    |       |                                                                                |
|            |                              |        |    | ---† (1) | √ (1) | <i>rrs</i> , <i>eis</i> NM (1)                                                 |
|            | <i>rrs</i> MUT1,(WT1)        | A1401G | 1  | R (1)    | √ (1) | <i>rrs</i> A 1401 G (1)                                                        |
|            | <i>rrs</i> MUT1              | A1401G | 3  | R (1)    |       |                                                                                |
|            |                              |        |    | S (1)    | √ (1) | <i>rrs</i> A 1401 G (1)                                                        |
|            |                              |        |    | ---† (1) | √ (1) | <i>rrs</i> T 1491 A (1)                                                        |
|            | <i>rrs</i> WT                |        | 89 | R (3)    | √ (3) | <i>rrs</i> , <i>eis</i> NM (2)                                                 |
|            |                              |        |    | S (81)   |       | <i>eis</i> G -10 A (1)                                                         |
|            |                              |        |    | ---† (5) | √ (5) | <i>rrs</i> , <i>eis</i> NM (5)                                                 |
|            | <i>rrs</i> (WT)              |        | 2  | S (2)    | √ (2) | <i>rrs</i> A 1401 G (1)                                                        |
| <b>EMB</b> |                              |        |    |          |       | <i>rrs</i> , <i>eis</i> NM (1)                                                 |
|            | <i>embB</i> ΔWT,MUT1A        | M306I  | 11 | R (10)   |       |                                                                                |

|                       |       |    |                 |                |                                                                                                                                                                                                                                                                                      |
|-----------------------|-------|----|-----------------|----------------|--------------------------------------------------------------------------------------------------------------------------------------------------------------------------------------------------------------------------------------------------------------------------------------|
| <i>embB</i> ΔWT,MUT1B | M306V | 15 | S (1)<br>R (13) | √ (1)          | <i>embB</i> AT <u>G</u> (M) 306 AT <u>A</u> (I) (1)                                                                                                                                                                                                                                  |
| <i>embB</i> ΔWT       | 306   | 6  | S (2)<br>R (5)  | √ (2)<br>√ (5) | <i>embB</i> <u>A</u> TG(M) 306 <u>G</u> TG(V) (2)<br><i>embB</i> AT <u>G</u> (M) 306 AT <u>T</u> (I) (2)<br><i>embB</i> AT <u>G</u> (M) 306 AT <u>C</u> (I) (2)<br><i>embB</i> <u>A</u> T <u>G</u> (M) 306 <u>C</u> TG(L) (1)<br><i>embB</i> AT <u>G</u> (M) 306 AT <u>T</u> (I) (1) |
| <i>embB</i> MUT1A     | M306I | 1  | S (1)<br>R (1)  | √ (1)          |                                                                                                                                                                                                                                                                                      |
| <i>embB</i> MUT1B     | M306V | 1  | R (1)           |                |                                                                                                                                                                                                                                                                                      |
| <i>embB</i> WT        |       | 65 | R (21)          | √ (21)         | <i>embB</i> AT <u>G</u> (M) 306 AT <u>C</u> (I) (1)<br><i>embB</i> T <u>A</u> T(Y) 319 T <u>G</u> T(I) (1)<br><i>embB</i> G <u>G</u> C(G) 407 G <u>C</u> C(A) (1)<br><i>embB</i> <u>G</u> CG(A) 410 <u>C</u> CG(P) (1)<br><i>embB</i> NM (15)<br>NA (2)                              |

S (44)

551 WT, presence of all wild-type bands for specific genes; ΔWT, omission of wild-type band; MUT, presence of specific mutation band; (WT) or  
552 (MUT), weak band; Δ*katG*, omission of *katG* locus control band; (*inhA*), *inhA* locus control band was very weak  
553 R=resistant, S=sensitive, NA=not available, NM= no mutation  
554 \* To indicate INH resistance by reading both *katG* and *inhA* bands  
555 † Conventional DST result was not available.
